# Supplementary material for: Imaging methods for quantifying glenoid and Hill-Sachs bone loss in traumatic instability of the shoulder: a scoping review
Source: Springer Nature journal article supplement (doi:10.1186/s12891-015-0607-1), 2015-07-17
Supplement: MOESM1 [file 9752426]

## Appendix

| <b>MEDLINE Search Strategy</b> |                                                                                                                                                                                                                                                                                               |
|--------------------------------|-----------------------------------------------------------------------------------------------------------------------------------------------------------------------------------------------------------------------------------------------------------------------------------------------|
| 1                              | (computed tomography or ct).mp.                                                                                                                                                                                                                                                               |
| 2                              | image interpretation, computer-assisted/ or radiographic image interpretation, computer-assisted/ or exp tomography, emission-computed/ or tomography, x-ray computed/ or four-dimensional computed tomography/ or tomography, spiral computed/ or imaging, three-dimensional/ or holography/ |
| 3                              | exp Radiography/                                                                                                                                                                                                                                                                              |
| 4                              | X-Rays/                                                                                                                                                                                                                                                                                       |
| 5                              | (radiograph* or x ray*).mp.                                                                                                                                                                                                                                                                   |
| 6                              | exp Magnetic Resonance Imaging/                                                                                                                                                                                                                                                               |
| 7                              | (magnetic resonance or mri).mp.                                                                                                                                                                                                                                                               |
| 8                              | image processing, computer-assisted/ or imaging, three-dimensional/                                                                                                                                                                                                                           |
| 9                              | Diagnostic Imaging/                                                                                                                                                                                                                                                                           |
| 10                             | imaging.ti.                                                                                                                                                                                                                                                                                   |
| 11                             | or/1-10                                                                                                                                                                                                                                                                                       |
| 12                             | Shoulder Joint/                                                                                                                                                                                                                                                                               |
| 13                             | Humeral Head/                                                                                                                                                                                                                                                                                 |
| 14                             | (glenoid or hill sachs or bankert or glenohumeral or humeral head).mp.                                                                                                                                                                                                                        |
| 15                             | 12 or 13 or 14                                                                                                                                                                                                                                                                                |
| 16                             | Joint Instability/                                                                                                                                                                                                                                                                            |
| 17                             | shoulder dislocation/ or shoulder fracture/                                                                                                                                                                                                                                                   |
| 18                             | ((bony or bone) and (defect* or lesion* or loss or fracture*)).mp.                                                                                                                                                                                                                            |
| 19                             | 16 or 17 or 18                                                                                                                                                                                                                                                                                |
| 20                             | 11 and 15 and 19                                                                                                                                                                                                                                                                              |
| 21                             | di.fs.                                                                                                                                                                                                                                                                                        |
| 22                             | diagnos*.mp.                                                                                                                                                                                                                                                                                  |
| 23                             | exp "Sensitivity and Specificity"/                                                                                                                                                                                                                                                            |
| 24                             | (inter rater or interrater or intrarater or intrarater).mp.                                                                                                                                                                                                                                   |
| 25                             | (sensitiv* or specific*).mp.                                                                                                                                                                                                                                                                  |
| 26                             | accuracy.ti,ab.                                                                                                                                                                                                                                                                               |
| 27                             | (quantif* or measur*).ti,ab.                                                                                                                                                                                                                                                                  |
| 28                             | 21 or 22 or 23 or 24 or 25 or 26 or 27                                                                                                                                                                                                                                                        |
| 29                             | 20 and 28                                                                                                                                                                                                                                                                                     |
| 30                             | ((glenoid or hill sachs or bankert or glenohumeral or humeral head) adj5 (defect or loss or lesion* or fracture*)).mp.                                                                                                                                                                        |

|                                                                                                                                                                                                                                                                                                                                                                                                                                                                         |                                                                                                                            |
|-------------------------------------------------------------------------------------------------------------------------------------------------------------------------------------------------------------------------------------------------------------------------------------------------------------------------------------------------------------------------------------------------------------------------------------------------------------------------|----------------------------------------------------------------------------------------------------------------------------|
| 31                                                                                                                                                                                                                                                                                                                                                                                                                                                                      | 11 and 30                                                                                                                  |
| 32                                                                                                                                                                                                                                                                                                                                                                                                                                                                      | 29 or 31                                                                                                                   |
| <b>EMBASE Search Strategy</b>                                                                                                                                                                                                                                                                                                                                                                                                                                           |                                                                                                                            |
| 1                                                                                                                                                                                                                                                                                                                                                                                                                                                                       | radiography/ or exp shoulder radiography/                                                                                  |
| 2                                                                                                                                                                                                                                                                                                                                                                                                                                                                       | 2. computer assisted diagnosis/ or computer assisted radiography/ or exp computer assisted tomography/                     |
| 3                                                                                                                                                                                                                                                                                                                                                                                                                                                                       | 3. X ray/                                                                                                                  |
| 4                                                                                                                                                                                                                                                                                                                                                                                                                                                                       | 4. (x ray or radiograph* or computed tomography or ct).ti.                                                                 |
| 5                                                                                                                                                                                                                                                                                                                                                                                                                                                                       | 5. (magnetic resonance imaging or magnetic resonance arthrography or mri).ti.                                              |
| 6                                                                                                                                                                                                                                                                                                                                                                                                                                                                       | 6. radiodiagnosis/ or diagnostic imaging/ or exp nuclear magnetic resonance imaging/ or exp tomography/                    |
| 7                                                                                                                                                                                                                                                                                                                                                                                                                                                                       | 7. or/1-6                                                                                                                  |
| 8                                                                                                                                                                                                                                                                                                                                                                                                                                                                       | 8. Joint Instability/                                                                                                      |
| 9                                                                                                                                                                                                                                                                                                                                                                                                                                                                       | 9. ((bony or bone) and (defect* or lesion* or loss or fracture*)).ti,ab. or osteolysis/                                    |
| 10                                                                                                                                                                                                                                                                                                                                                                                                                                                                      | 10. shoulder dislocation/ or shoulder fracture/                                                                            |
| 11                                                                                                                                                                                                                                                                                                                                                                                                                                                                      | 11. shoulder/                                                                                                              |
| 12                                                                                                                                                                                                                                                                                                                                                                                                                                                                      | 12. humerus head/                                                                                                          |
| 13                                                                                                                                                                                                                                                                                                                                                                                                                                                                      | 13. (glenoid or hill sachs or bankert or glenohumeral or humeral head).mp.                                                 |
| 14                                                                                                                                                                                                                                                                                                                                                                                                                                                                      | 14. 11 or 12 or 13                                                                                                         |
| 15                                                                                                                                                                                                                                                                                                                                                                                                                                                                      | 15. 8 or 9 or 10                                                                                                           |
| 16                                                                                                                                                                                                                                                                                                                                                                                                                                                                      | 16. 7 and 14 and 15                                                                                                        |
| 17                                                                                                                                                                                                                                                                                                                                                                                                                                                                      | 17. di.fs.                                                                                                                 |
| 18                                                                                                                                                                                                                                                                                                                                                                                                                                                                      | 18. predict.ti,ab.                                                                                                         |
| 19                                                                                                                                                                                                                                                                                                                                                                                                                                                                      | 19. specificity.ti,ab.                                                                                                     |
| 20                                                                                                                                                                                                                                                                                                                                                                                                                                                                      | 20. diagnos*.ti,ab.                                                                                                        |
| 21                                                                                                                                                                                                                                                                                                                                                                                                                                                                      | 21. (quantif* or measur*).ti,ab.                                                                                           |
| 22                                                                                                                                                                                                                                                                                                                                                                                                                                                                      | 22. 17 or 18 or 19 or 20 or 21                                                                                             |
| 23                                                                                                                                                                                                                                                                                                                                                                                                                                                                      | 23. 16 and 22                                                                                                              |
| 24                                                                                                                                                                                                                                                                                                                                                                                                                                                                      | 24. ((glenoid or hill sachs or bankert or glenohumeral or humeral head) adj5 (defect or loss or lesion* or fracture*)).mp. |
| 25                                                                                                                                                                                                                                                                                                                                                                                                                                                                      | 25. 7 and 24                                                                                                               |
| 26                                                                                                                                                                                                                                                                                                                                                                                                                                                                      | 26. 23 or 25                                                                                                               |
| <b>Scopus Search Strategy</b>                                                                                                                                                                                                                                                                                                                                                                                                                                           |                                                                                                                            |
| ((TITLE((glenoid OR "hillsachs" OR shoulder OR bankert)) AND TITLE((fracture* OR loss OR instability OR defect* OR lesion*)) AND TITLE(imaging OR roentgenogram* OR radiolog* OR xray* OR ct OR "computed tomography" OR mri OR "magnetic resonance"))))OR (((TITLE((glenoid OR "hill sachs" OR shoulder OR bankert)) OR KEY((glenoid OR "hillsachs" OR shoulder OR bankert)))) AND ((TITLE(fracture* OR loss OR instability OR defect* OR lesion*) OR KEY(fracture* OR |                                                                                                                            |

loss OR instability OR defect\* OR lesion\*)) AND((TITLE(bone) OR KEY(bone))) AND ((TITLE(imaging OR roentgenogram\* OR radiolog\* OR x-ray\* OR ct OR "computed tomography" OR mri OR "magnetic resonance") OR KEY(imaging OR roentgenogram\* OR radiolog\* OR x-ray\* OR ct OR "computed tomography" OR mri OR "magnetic resonance"))))

**Web of Science Search Strategy**

# **687** #2 OR #1  
3

*Databases=SCI-EXPANDED, CPCI-S*  
*Timespan=All Years*  
*Lemmatization=On*

# **611** Topic=((glenoid or "hill sachs" or shoulder  
2 or bankart)) AND Topic=((fracture\* or loss  
or instability or defect\* or lesion\*) AND  
bone) AND Topic=(imaging or  
roentgenogram\* or radiolog\* or x-ray\* or  
CT or "computed tomography" or mri or  
"magnetic resonance")

*Databases=SCI-EXPANDED, CPCI-S*  
*Timespan=All Years*  
*Lemmatization=On*

# **103** Title=((glenoid or "hill sachs" or shoulder or  
1 bankart)) AND Title=((fracture\* or loss or  
instability or defect\* or lesion\*)) AND  
Title=(imaging or roentgenogram\* or  
radiolog\* or x-ray\* or CT or "computed  
tomography" or mri or "magnetic  
resonance")

*Databases=SCI-EXPANDED, CPCI-S*  
*Timespan=All Years*  
*Lemmatization=On*
